# Supplementary material for: Motor Neuron Abnormalities Correlate with Impaired Movement in Zebrafish that Express Mutant Superoxide Dismutase 1
Source: PubMed Central journal article supplement (PMC6357263; doi:10.1089/zeb.2018.1588), 2019-01-31
Supplement: Supp_Fig1.pdf [file Supp_Fig1.pdf]

## Supplementary Data

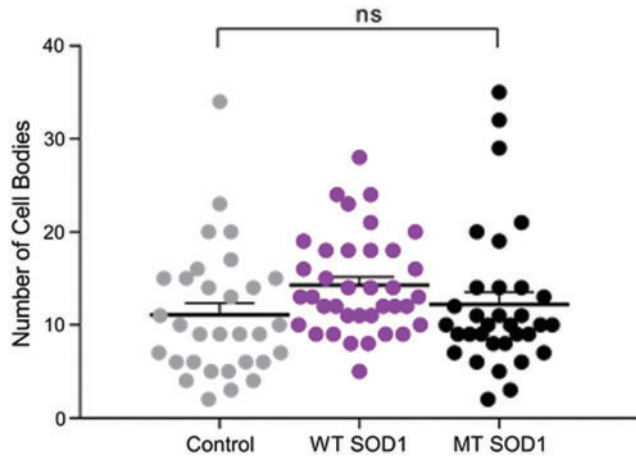

**SUPPLEMENTARY FIG. S1.** Manual counting of neuronal cell bodies within the spinal cord of 48 hours post-fertilization noninjected, WT SOD1-expressing and MT SOD1-expressing zebrafish larvae revealed no significant difference between the three groups ( $p=0.7385$ ). WT, wild type; MT, mutant; SOD1, superoxide dismutase 1; ns, not significant.
