# Supplementary material for: Motor Neuron Abnormalities Correlate with Impaired Movement in Zebrafish that Express Mutant Superoxide Dismutase 1
Source: PubMed Central journal article supplement (PMC6357263; doi:10.1089/zeb.2018.1588), 2019-01-31
Supplement: Supp_Fig2.pdf [file Supp_Fig2.pdf]

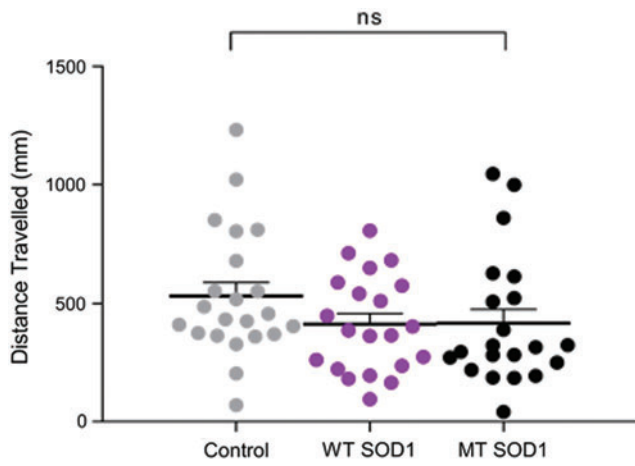

**SUPPLEMENTARY FIG. S2.** There was no significant difference in the distance swum by noninjected, WT SOD1-expressing and MT SOD1-expressing zebrafish during an escape response to darkness test at 6 days postfertilization ( $p=0.2152$ ). ns, not significant.
